# Supplementary material for: Au-modified α-Fe2O3 nanoparticles for ultrasensitive isopropanol detection
Source: Royal Society of Chemistry journal article supplement (doi:10.1039/d3nj03533f), 2023-01-01
Supplement: d3nj03533f1.pdf [file d3nj03533f1.pdf]

# Supporting Information

## Isopropanol gas sensor based on Au nanoparticles

### compounded with $\alpha$ -Fe<sub>2</sub>O<sub>3</sub> nanomaterials

Lexian Sang,<sup>‡a</sup> Yun Wang,<sup>‡a</sup> Shan Sun,<sup>a</sup> Yi Tian,<sup>c</sup> Yunying Xie,<sup>a</sup> Fuchao Jia,<sup>a</sup> Tong Zhou,<sup>a</sup> Guangchao Yin,<sup>a</sup> Fazhe Sun<sup>\*b</sup> and Xiaomei Wang<sup>\*a</sup>

<sup>a</sup> *School of Physics and Optoelectronic Engineering, Shandong University of Technology, Zibo 255000, P. R. China*

<sup>b</sup> *Analysis and Testing Center, Shandong University of Technology, Zibo 255000, P. R. China*

<sup>c</sup> *College of Mechanical Engineering, Shandong University of Technology, Zibo 255000, P. R. China*

\* Corresponding author

‡ Equal contributions.

Address correspondence to E-mail: [xiaomeiwang@sdut.edu.cn](mailto:xiaomeiwang@sdut.edu.cn); [sunfazhe@163.com](mailto:sunfazhe@163.com)

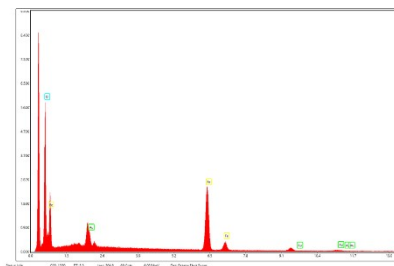

**Fig. S1** EDS spectrum of AF-4 composite materials.

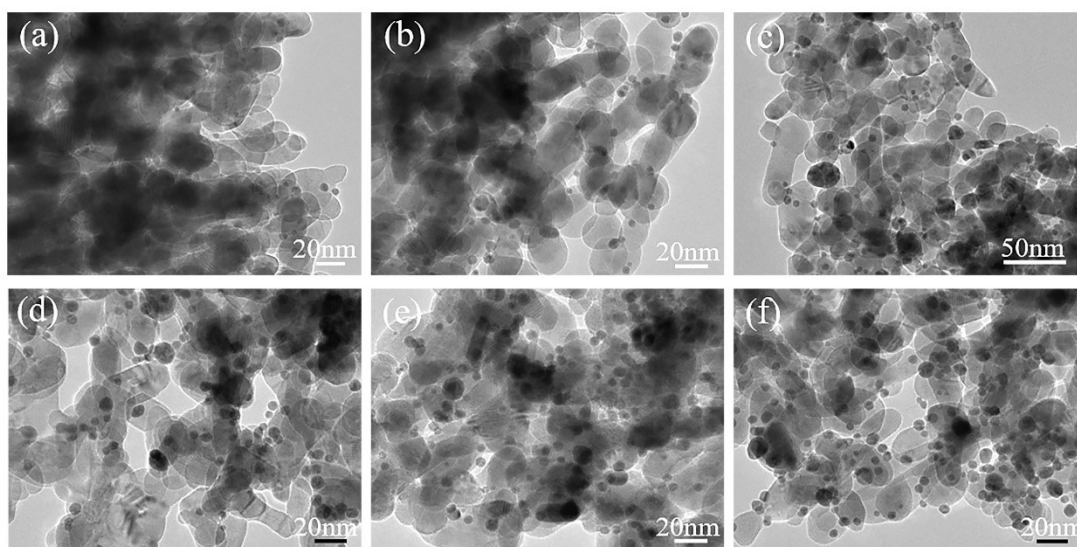

**Fig. S2** TEM images of (a) AF-1, (b) AF-2, (c) AF-3, (d) AF-4, (e) AF-5 and (f) AF-6 composite materials.

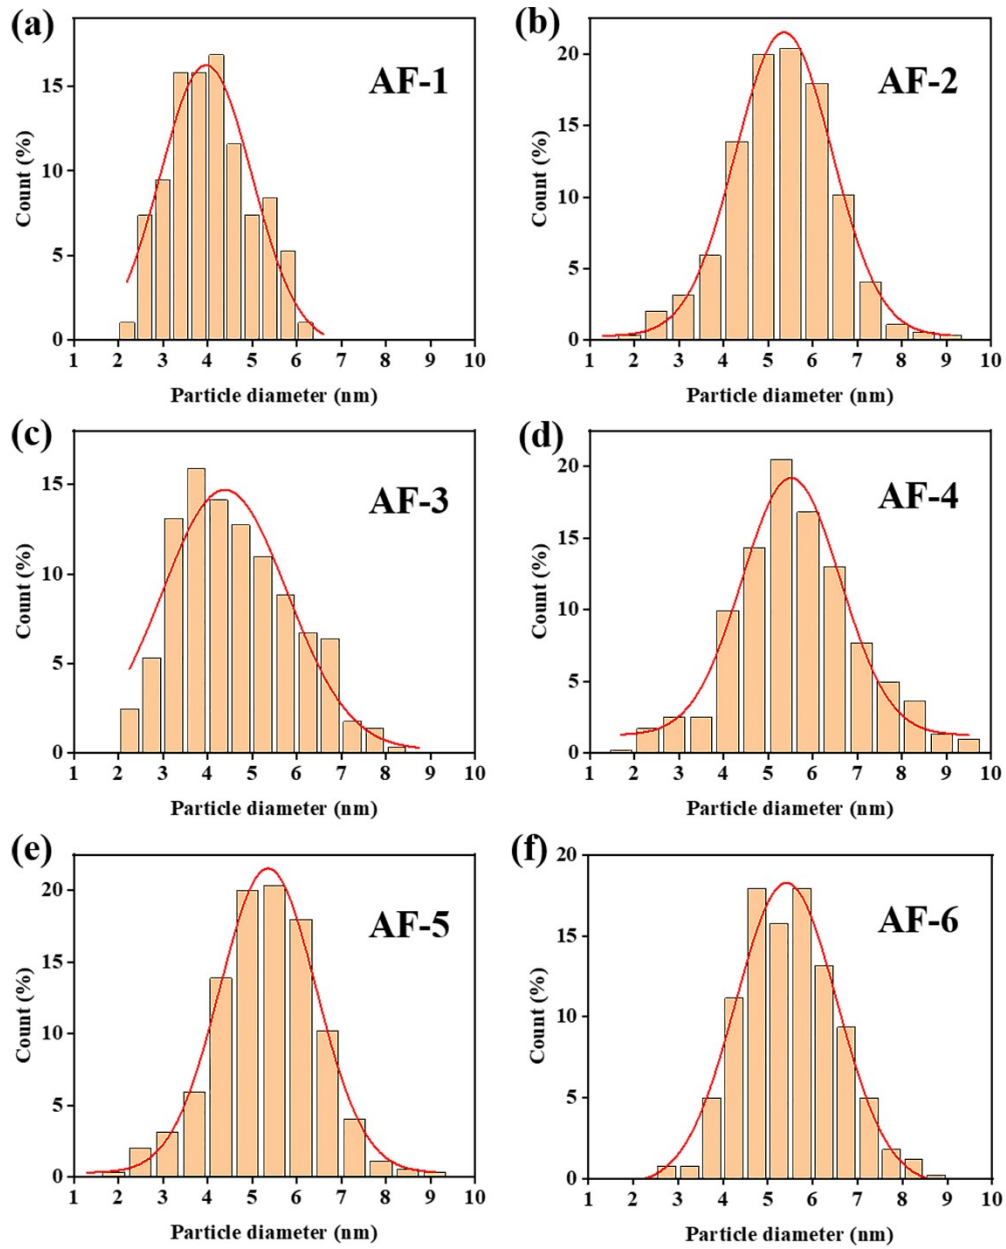

**Fig. S3** The statistics histogram of (a) AF-1, (b) AF-2, (c) AF-3, (d) AF-4, (e) AF-5 and (f) AF-6 composite materials.
